# Supplementary material for: Roles of Mso1 and the SM protein Sec1 in efficient vesicle fusion during fission yeast cytokinesis
Source: PubMed Central journal article supplement — Mol Biol Cell. 2020 Jul 15;31(15):1570–83. doi: 10.1091/mbc.E20-01-0067 (PMC7521796; doi:10.1091/mbc.e20-01-0067), 2020-07-15
Supplement: mbc-31-1570-s001.pdf [file mbc-31-1570-s001.pdf]

# Supplemental Materials

*Molecular Biology of the Cell*

Gerien et al.

Gerien, Supplemental Figure S1

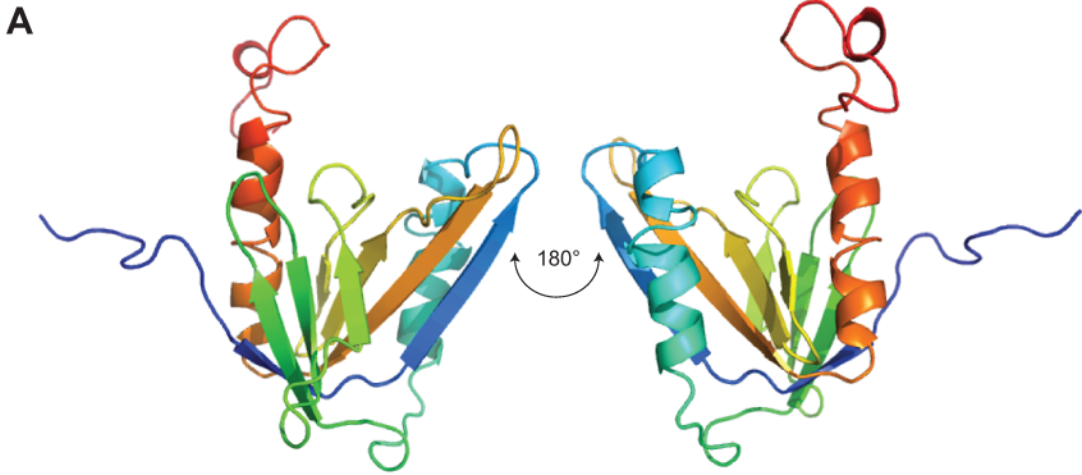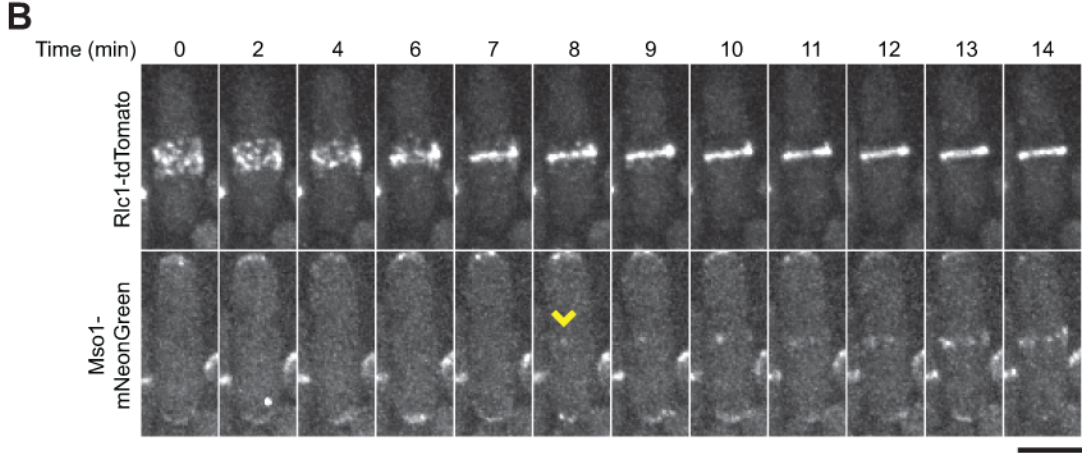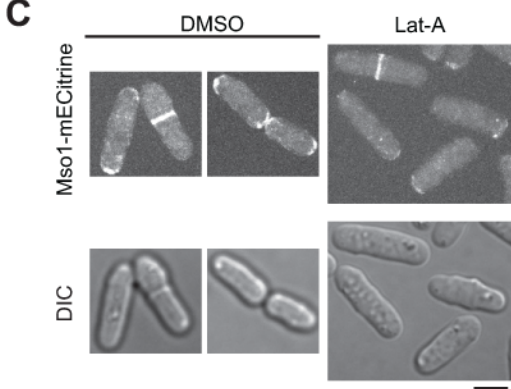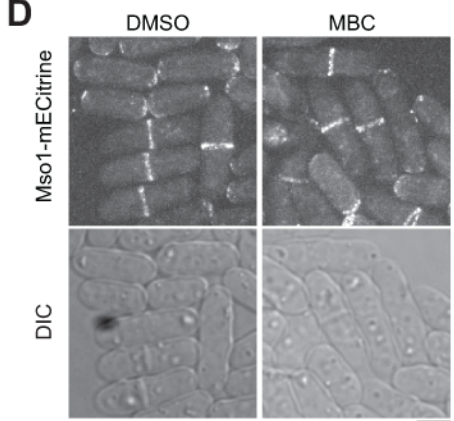

**SUPPLEMENTAL FIGURE S1:** (A) Homology modeling of Mso1 using the crystal structure of human Mint1 as a template [PDB: 4DBB (Matos et al., 2012)]. (B) Comparison of Rlc1-tdTomato node condensation into the contractile ring to the arrival of Mso1-mNeonGreen to the division site. (C) Mso1-mECitrine localization in cells treated with DMSO or with Latrunculin-A to disrupt actin filaments. (D) Mso1-mECitrine localization in cells treated with DMSO or with MBC to disrupt microtubules. Bars, 5  $\mu$ m.

Gerien, Supplemental Figure S2

**A**

WT

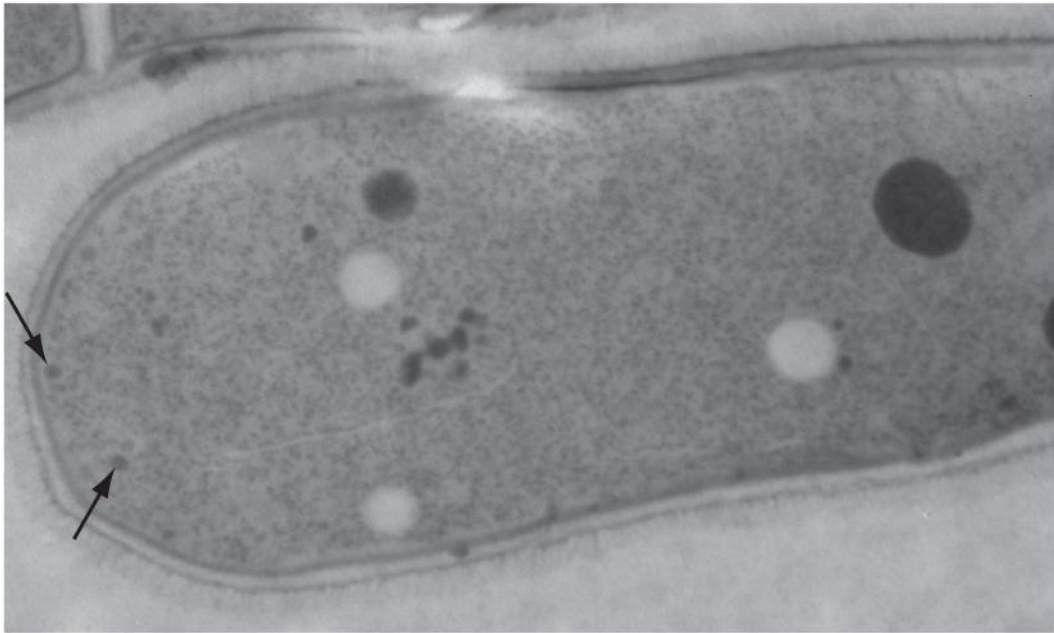

**B**

*mso1Δ*

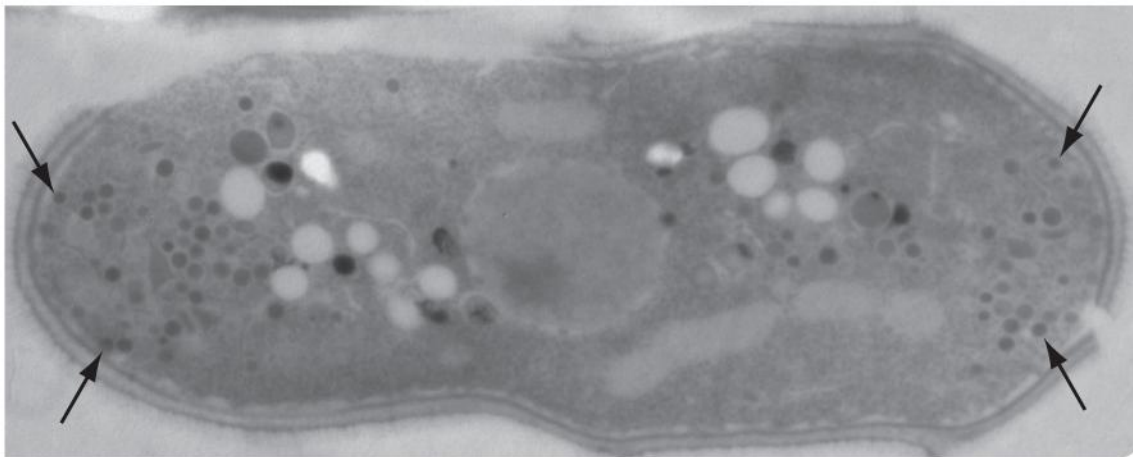

**SUPPLEMENTAL FIGURE S2:** (A, B) Electron micrographs of WT (A) and *mso1Δ* (B) cells in interphase. Arrows point to examples of vesicles near the cells tips. Bars, 500 nm.

Gerien, Supplemental Figure S3

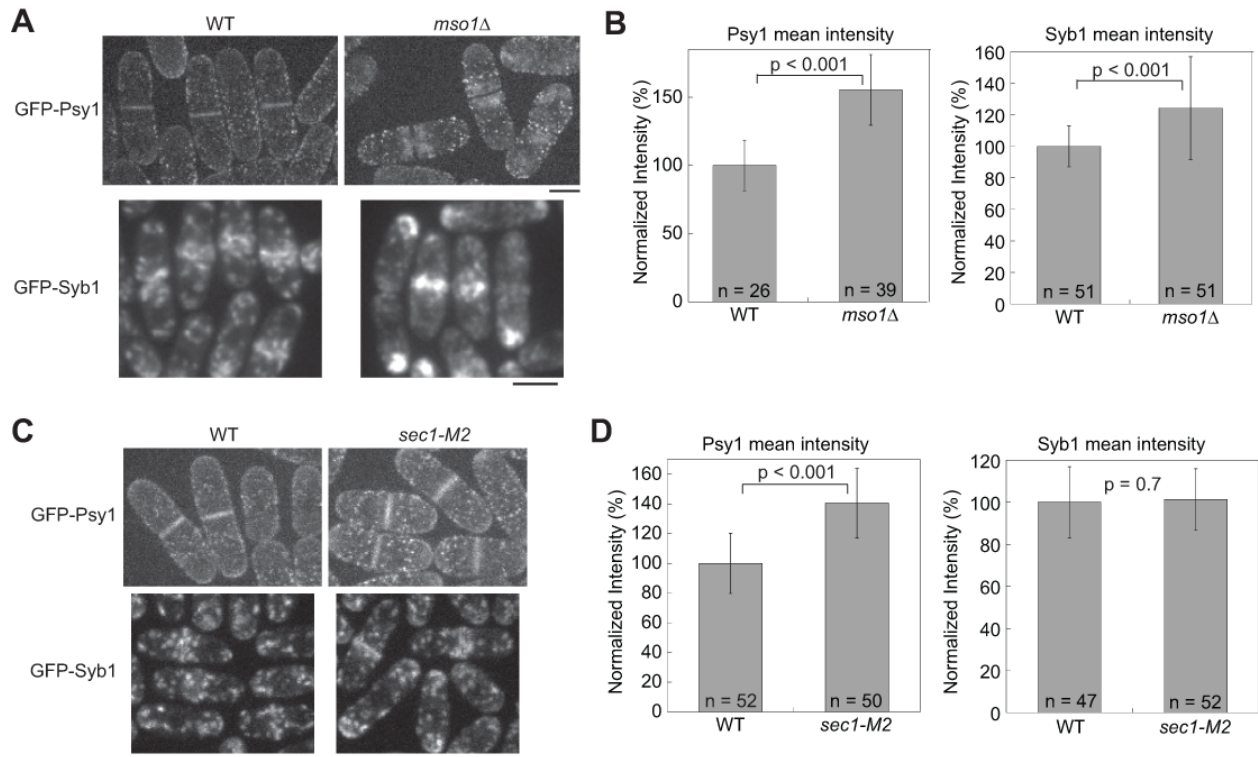

**SUPPLEMENTAL FIGURE S3:** (A, B) Sum intensity projections (A) and quantifications (B) of global intensity (mean  $\pm$  standard deviations) of GFP-Psy1 and GFP-Syb1 in septating WT and *mso1Δ* cells after grown for 2 hours at 36°C. (C, D) Sum intensity projections (C) and quantifications (D) of global intensity (mean  $\pm$  standard deviations) of GFP-Psy1 and GFP-Syb1 in septating WT and *sec1-M2* cells after grown for 2 hours at 36°C.

## Gerien, Supplemental Figure S4

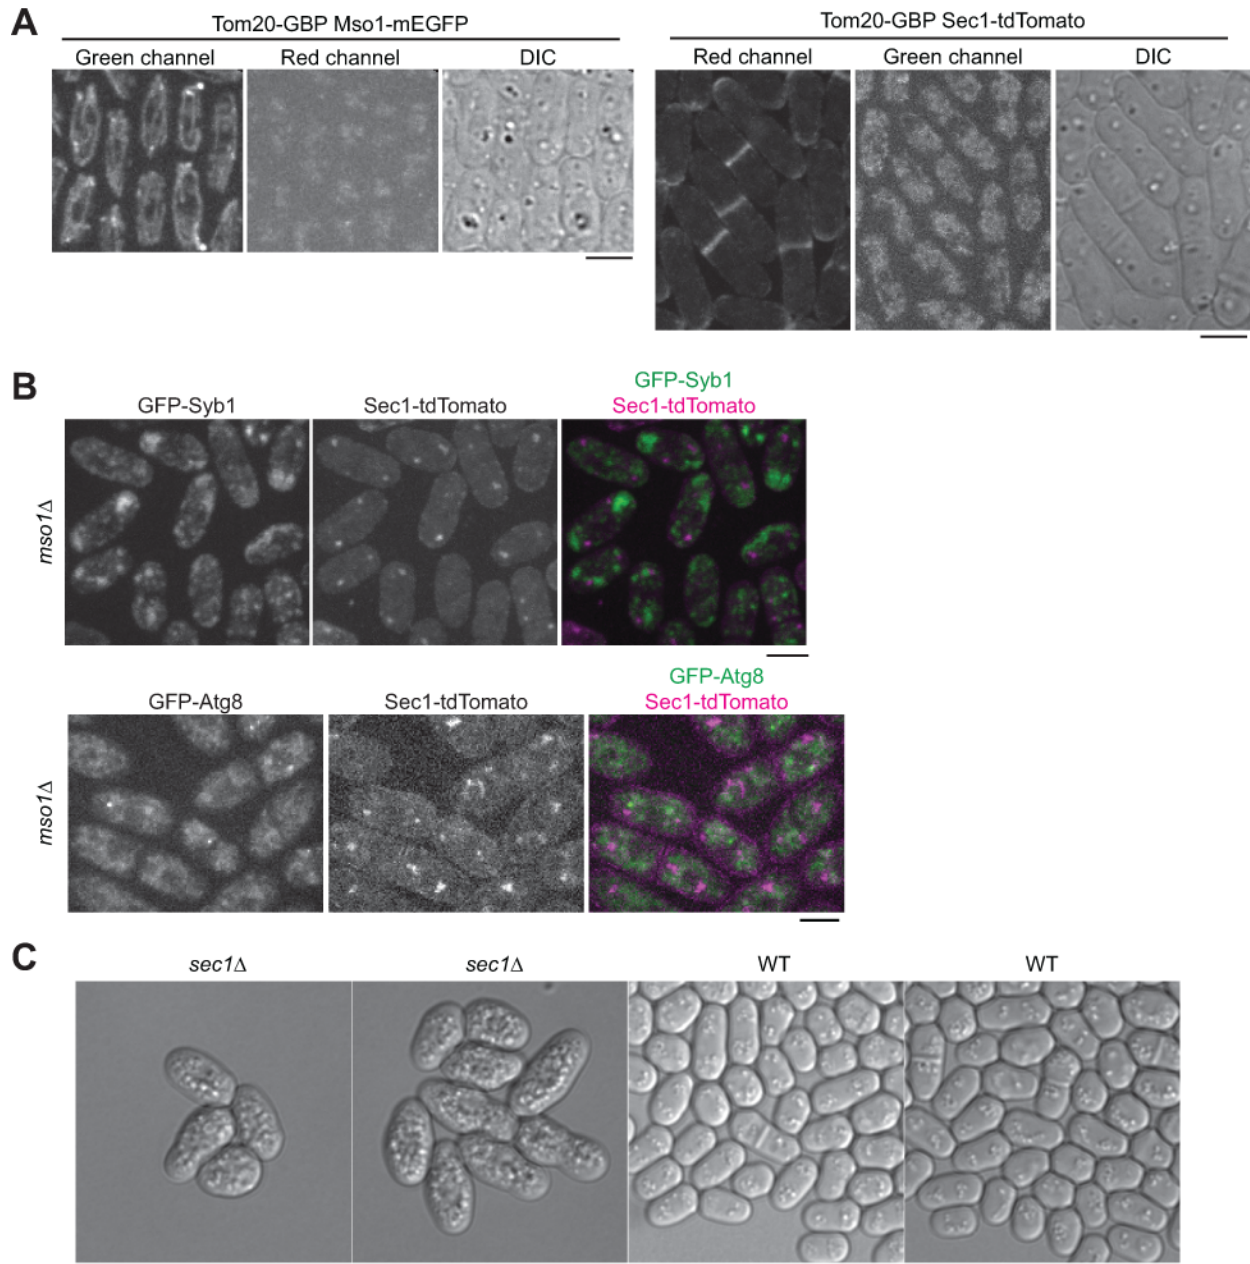

**SUPPLEMENTAL FIGURE S4:** (A) Controls for Tom20-GBP mislocalization experiments. Left, Tom20-GBP recruits Mso1-mEGFP to the mitochondria. Right, Tom20-GBP cannot recruit Sec1-tdTomato to the mitochondria. No signal bleedthrough between green and red channels was detected. (B) Sec1 imaged with a vesicle marker Syb1 or an autophagy marker Atg8 in *mso1Δ*

cells grown for 2 hours at 36°C. (C) DIC images of *sec1*<sup>+</sup> and *sec1*<sup>-</sup> cells from a representative tetrad grown on YE5S plate at 25°C.
